# Supplementary material for: Frailty and the risk of dementia: is the association explained by shared environmental and genetic factors?
Source: Springer Nature journal article supplement (doi:10.1186/s12916-021-02104-3), 2021-10-18
Supplement: MOESM1 [file 19768492]

Additional file 1

## Frailty and the risk of dementia: is the association explained by shared environmental and genetic factors?

### Contents

|                                                                                                                                                                                                                                                                            |    |
|----------------------------------------------------------------------------------------------------------------------------------------------------------------------------------------------------------------------------------------------------------------------------|----|
| Appendix S1. Supplementary methods.....                                                                                                                                                                                                                                    | 2  |
| <i>Cognitive impairment screening</i> .....                                                                                                                                                                                                                                | 2  |
| <i>Within-pair analysis using the between-within model</i> .....                                                                                                                                                                                                           | 2  |
| Appendix S2. Supplementary results.....                                                                                                                                                                                                                                    | 3  |
| Table S1. The 44 frailty items and the coding rules .....                                                                                                                                                                                                                  | 4  |
| Table S2. ICD codes used to identify dementia. ....                                                                                                                                                                                                                        | 7  |
| Table S3. ATC-codes for identification of dementia medication. ....                                                                                                                                                                                                        | 7  |
| Table S4. Descriptive statistics of the cognitive sample.. ....                                                                                                                                                                                                            | 8  |
| Table S5. Descriptive statistics of the study population stratified by dementia diagnosis.....                                                                                                                                                                             | 9  |
| Table S6. Descriptive statistics of the study population by sex. ....                                                                                                                                                                                                      | 10 |
| Table S7. Association of the frailty index (FI) with the risk of dementia assessed by Cox regression in the cognitive sample (left panel) and in the genotyped samples II adjusted for <i>APOE ε4</i> carrier status (right panel).....                                    | 11 |
| Table S8. Association of the frailty index (FI) with the risk of dementia assessed by the competing risk model in the full (left panel) and cognitive (right panel) samples. ....                                                                                          | 12 |
| Table S9. Association of the frailty categories with the risk of dementia assessed by Cox regression in the full (left panel) and cognitive (right panel) samples .....                                                                                                    | 13 |
| Table S10. Association of the frailty index (FI) with the risk of dementia in complete DZ and MZ twin pairs in the multivariate Cox model (left panel) and in the within-pair model (right panel). ...                                                                     | 14 |
| Table S11. Sex-stratified associations between the frailty index (FI) and the risk of dementia in dizygotic (DZ) and monozygotic (MZ) twins .....                                                                                                                          | 15 |
| Table S12. The associations between dementia and the frailty index (FI) constructed from traditional risk factors for dementia (FI-TRF, Model 1) and non-traditional risk factors for dementia (FI-NTRF, Model 2) assessed by Cox regression in the cognitive sample ..... | 16 |
| Figure S1. The distribution of the frailty index (FI) in the full (A) and cognitive samples (B) by sex. ....                                                                                                                                                               | 17 |
| Figure S2. Assessing the functional form of the association between the frailty index (FI) and the risk of dementia in the full sample. ....                                                                                                                               | 18 |
| Figure S3. Kaplan-Meier plots for being dementia-free during the follow-up for non-frail, pre-frail, and frail individuals in the full (A) and cognitive sample (B). ....                                                                                                  | 19 |
| Figure S4. The ratio of the hazard ratios (HRs; $HR_{DZ}/HR_{MZ}$ ) in the within-pair interaction model in the within-pair sample I.....                                                                                                                                  | 20 |

**Figure S5. Hazard ratios (HRs) and the subdistribution HR (SHR) for the competing risk model and 95% confidence intervals (CIs) of incident dementia in relation to a 10% increase in the frailty index (FI) in the cognitive sample..** ..... 21

**References** ..... 22

## **Appendix S1. Supplementary methods**

### *Cognitive impairment screening*

Those aged 65 and older in SALT received a telephone cognitive screening instrument (TELE) for baseline cognitive assessment. TELE includes a 10-item mental status questionnaire, 3-word recall, a word similarities task and questions about health and daily functioning (1). The TELE score ranges from 0 to 19. For those who performed poorly in the TELE assessment (less than 13.5 points), an informant was interviewed using the Blessed Dementia Rating Scale (BDRS) (2) to assess how much the individual's cognitive levels interfered with daily functioning. After combining the TELE and BDRS assessments, the cognitive status of each individual was classified into four levels as follows: 0 (cognitively intact), 1 (minor errors), 2 (performed poorly) and 3 (cognitive dysfunction) as previously described (1). Those classified as having cognitive dysfunction were excluded from the current analysis.

### *Within-pair analysis using the between-within model.*

The between-within (BW) model (3) in twin pairs was applied in the framework of the Cox proportional hazards model with time since baseline measurement as the underlying timescale. The equation can be written as follows:

$$\lambda(t_{ij}) = \lambda_0(t_{ij})\tilde{Z}_i \exp(\beta_B \bar{FI}_i + \beta_W FI_{ij} + \Sigma \delta_{B_k} \bar{C}_{i_k} + \Sigma \delta_{W_k} C_{ij_k})$$

where  $\lambda(t_{ij})$  is the hazard function at time  $t_{ij}$  and  $\lambda_0(t)$  is the baseline hazard. A shared random effect following a gamma distribution was included in the model (the cluster-specific frailty  $\tilde{Z}_i$  was assumed to follow a gamma distribution). The main exposure, frailty index (FI) is split into a between-pair effect  $\beta_B$  that scales the contribution of the averaged value  $\bar{FI}_i$  in the  $i$ -th twin pair, and a within-pair effect  $\beta_W$  that scales the observed value  $FI_{ij}$  for twin  $j$  in pair  $i$ . Adjustment for the other covariates was done similarly and is indicated in the equation via the averaged between-pair term  $\bar{C}_{i_k}$  and the observed individual term  $C_{ij_k}$ , where  $k$  varies over education, tobacco use and cognitive function level. The effect of the FI in the model is modeled as a between-pair effect  $\beta_B$  capturing covariate effects shared by both members in the twin pair, and as a within-pair effect  $\beta_W$  capturing covariate effects specific to each individual and adjusted for shared effects (only the within-effects are tabulated in the results). The estimated  $\exp(\beta_W)$  term adjusted for familial effects i.e., genetics and shared environmental effects is presented as a hazard ratio (HR) for the within-pair effect of the FI separately in DZ and MZ twin pairs (Table 4 and Figure 2). To

assess the age-varying HRs, the BW model was reformulated for both DZ and MZ twin pairs and written as follows:

$$\lambda(t_{ij}) = \lambda_0(t_{ij})\tilde{Z}_i \exp(\beta_B \bar{FI}_i + \beta_W FI_{ij} + FI_{ij} s_1(Age_{ij}; \beta_W) + \Sigma \delta_{B_k} \bar{C}_{i_k} + \Sigma \delta_{W_k} C_{ij_k})$$

where  $s_1(t_{ij}; \beta_W)$  is a smooth function representing the within twin pair effect that varies over the age at FI assessment, and  $\beta_W$  is a vector of parameters. The smooth parameters were modeled as natural splines with 3 degrees of freedom for the time-dependent HRs.

To assess the difference of the age-varying HRs in DZ and MZ twins, the DZ and MZ twins were analyzed in the same BW model with two interaction terms (FI and zygosity, FI, zygosity and age) introduced, and modeled model with the smooth function. The model is written as follows:

$$\lambda(t_{ij}) = \lambda_0(t_{ij})\tilde{Z}_i \exp(\beta_B \bar{FI}_i + \beta_W FI_{ij} + FI_{ij} \cdot s_1(Age_{ij}; \beta_W) + \beta_1 zygosity + \beta_2 FI_{ij} \cdot zygosity + FI_{ij} \cdot zygosity \cdot s_1(Age_{ij}; \beta_2) + \Sigma \delta_{B_k} \bar{C}_{i_k} + \Sigma \delta_{W_k} C_{ij_k})$$

Here, *zygosity* represents DZ or MZ twin,  $\beta_2$  is the effect of the interaction term between FI and zygosity and *Age<sub>ij</sub>* denotes age at FI measurement.

## Appendix S2. Supplementary results

Of the 10,487 individuals (mean age =72.4, SD=5.9) in the cognitive sample, 2,355 were diagnosed with dementia, 4,786 died and 3,346 were censored during the follow-up (Table S4). The proportional hazards assumption was met for the cognitive sample.

In the cognitive sample, a 10% increase in the FI was associated with the risk of dementia, the estimate being HR 1.15 (95%CI 1.09, 1.20) without adjusting for cognitive level and HR 1.13 (95% CI 1.07, 1.18) after adjusting for cognitive level (all models adjusted for age, sex, education and tobacco use; Table S10, left panel).

Table S10 shows the associations of the FI with the risk of dementia in complete DZ and MZ twin pairs of the within-pair sample II in the multivariate Cox model (left panel) and in the within-pair model (right panel). Formal testing of the difference in the population level estimate and within-pair estimate (Table S10 right vs. left panel MZ estimate) indicated no significant difference (p=0.21) in the cognitive sample.

Table S12 shows the associations between dementia and FI constructed from traditional (FI-TRF, Model 1) and non-traditional risk factors (FI-NTRF, Model 2) for dementia with the risk of dementia using Cox regression in the cognitive sample adjusted for age, sex, education, tobacco

use and cognitive function level. The FI-NTRF was significantly associated with the risk of dementia (Table S12).

**Table S1. The 44 frailty items and the coding rules**

| No. | Question                                                                                       | Coding                                                       | Dementia risk factor |    |
|-----|------------------------------------------------------------------------------------------------|--------------------------------------------------------------|----------------------|----|
|     |                                                                                                |                                                              | Yes                  | No |
| 1   | How do you estimate your general health?                                                       | Excellent=0, Good=0.25, Average=0.5, Not so good=0.75, Bad=1 |                      | X  |
| 2   | Do you think your health status prevents you from doing things you want to do?                 | Not at all=0, To some extent=0.5, A great deal=1             |                      | X  |
| 3   | How many times a year do you get serious infections (other than respiratory)?                  | 0-1 times=0, 2-4 times=0.5, 5 times or more=1                |                      | X  |
| 4   | Do you have buzzing in the ears?                                                               | Both ears or one ear=1, No=0                                 |                      | X  |
| 5   | Do you have or have you had angina pectoris                                                    | No=0, Yes=1                                                  |                      | X  |
| 6   | Do you have or have you had heart attack                                                       | No=0, Yes=1                                                  |                      | X  |
| 7   | Do you have or have you had heart failure                                                      | No=0, Yes=1                                                  |                      | X  |
| 8   | Do you have or have you had high blood pressure                                                | No=0, Yes=1                                                  | X                    |    |
| 9   | Do you have or have you had lipid disorder, for example high cholesterol or high triglycerides | No=0, Yes=1                                                  | X                    |    |
| 10  | Do you have or have you had vascular spasm in the legs (intermittent claudication)             | No=0, Yes=1                                                  |                      | X  |
| 11  | Do you have or have you had clot in the leg (venous thrombosis)                                | No=0, Yes=1                                                  |                      | X  |
| 12  | Do you have or have you had cerebral hemorrhage or clot in the brain (stroke)                  | No=0, Yes=1                                                  | X                    |    |

|    |                                                                                                       |             |   |
|----|-------------------------------------------------------------------------------------------------------|-------------|---|
| 13 | Do you have or have you had TIA attacks (temporary weakness or paralysis or reduction of sensibility) | No=0, Yes=1 | X |
| 14 | Do you have or have you had irregular cardiac rhythm/atrial fibrillation                              | No=0, Yes=1 | X |
| 15 | Do you have or have you had chronic lung disease (including chronic bronchitis and emphysema)         | No=0, Yes=1 | X |
| 16 | Do you have or have you had dizziness                                                                 | No=0, Yes=1 | X |
| 17 | Do you have or have you had rheumatoid arthritis                                                      | No=0, Yes=1 | X |
| 18 | Do you have or have you had knee joint problem                                                        | No=0, Yes=1 | X |
| 19 | Do you have or have you had sciatica                                                                  | No=0, Yes=1 | X |
| 20 | Do you have or have you had osteoporosis                                                              | No=0, Yes=1 | X |
| 21 | Do you have or have you had hip joint problem                                                         | No=0, Yes=1 | X |
| 22 | Do you have or have you had back pain                                                                 | No=0, Yes=1 | X |
| 23 | Do you have or have you had neck pain                                                                 | No=0, Yes=1 | X |
| 24 | Do you have or have you had diabetes (including old age diabetes, and excluding pregnancy diabetes)   | No=0, Yes=1 | X |
| 25 | Do you have or have you had goiter                                                                    | No=0, Yes=1 | X |
| 26 | Do you have or have you had glandular diseases (excluding goiter)                                     | No=0, Yes=1 | X |
| 27 | Do you have or have you had gall bladder problem                                                      | No=0, Yes=1 | X |
| 28 | Do you have or have you had liver disease (for example, cirrhosis)                                    | No=0, Yes=1 | X |
| 29 | Do you have or have you had gout                                                                      | No=0, Yes=1 | X |

|    |                                                                          |                                                                       |   |   |
|----|--------------------------------------------------------------------------|-----------------------------------------------------------------------|---|---|
| 30 | Do you have or have you had kidney disease                               | No=0, Yes=1                                                           | X |   |
| 31 | Do you have or have you had stomach or intestine problems                | No=0, Yes=1                                                           |   | X |
| 32 | Do you have or have you had recurring urinary tract problems             | No=0, Yes=1                                                           |   | X |
| 33 | Do you have or have you had cancer, tumor disease or leukemia            | No=0, Yes=1                                                           |   | X |
| 34 | Do you have or have you had migraine                                     | No=0, Yes=1                                                           | X |   |
| 35 | Do you have or have you had asthma                                       | No=0, Yes=1                                                           |   | X |
| 36 | Do you have or have you had allergy                                      | No=0, Yes=1                                                           |   | X |
| 37 | Do you have recurrent periods of coughing?                               | No=0, Yes=1                                                           |   | X |
| 38 | You felt depressed. Never, seldom, often or always during the past week? | Never or almost never=0, Seldom=0.5, Often, always or almost always=1 | X |   |
| 39 | You were happy. Never, seldom, often or always during the past week?     | Never or almost never=1, Seldom=0.5, Often, always or almost always=0 |   | X |
| 40 | You felt lonely. Never, seldom, often or always during the past week?    | Never or almost never=0, Seldom=0.5, Often, always or almost always=1 |   | X |
| 41 | Do you have or have you had any physical handicap                        | No=0, Yes=1                                                           |   | X |
| 42 | Do you have or have you had Crohn's disease or Ulcerative colitis        | No=0, Yes=1                                                           |   | X |
| 43 | How is your vision?                                                      | Good=0, Reduced=0.5, Highly reduced or blind=1                        |   | X |
| 44 | How is your hearing?                                                     | Good=0, Reduced=0.5, Highly reduced=1                                 | X |   |

113 **Table S2. ICD codes used to identify dementia.**

| <b>ICD-7</b>                                        | <b>ICD-8</b>                                    | <b>ICD-9*</b>                                                  | <b>ICD-10</b>                                                                            |
|-----------------------------------------------------|-------------------------------------------------|----------------------------------------------------------------|------------------------------------------------------------------------------------------|
| (used before 1969)                                  | (used 1969-1986)                                | (used 1987-1996)                                               | (used 1997 and onwards)                                                                  |
| <b>304</b> Senile psychosis                         | <b>290</b> Senile and presenile dementia        | <b>290</b> Senile and presenile organic psychotic condition    | <b>F00</b> Dementia in Alzheimer's disease                                               |
| <b>305</b> Presenile psychosis                      | <b>293.0</b> Cerebral arteriosclerosis          | <b>294B/ 294.1</b> Dementia in conditions classified elsewhere | <b>F01</b> Vascular dementia                                                             |
| <b>306</b> Psychosis with cerebral arteriosclerosis | <b>293.1</b> Other cerebrovascular disturbances | <b>331A/ 331.0</b> Alzheimer's disease                         | <b>F02</b> Dementia in other diseases classified elsewhere                               |
|                                                     |                                                 | <b>331B/ 331.1</b> Pick's disease                              | <b>F03</b> Unspecified dementia                                                          |
|                                                     |                                                 | <b>331C/ 331.2</b> Senile degeneration of brain                | <b>F051</b> Delirium superimposed on dementia                                            |
|                                                     |                                                 | <b>331X/ 331.9</b> Cerebral degeneration, unspecified          | <b>G30</b> Alzheimer's disease                                                           |
|                                                     |                                                 |                                                                | <b>G311</b> Senile degeneration of brain, not elsewhere classified                       |
|                                                     |                                                 |                                                                | <b>G318A</b> Other specified degenerative diseases of nervous system: Lewy body dementia |

114 \*In the Swedish adaptation of ICD-9, the 4<sup>th</sup> digit was replaced with a letter. While the National  
115 Patient Register used the Swedish version, the international ICD version was used in the Cause of  
116 Death Register (10), and both versions are therefore reported here.

117

118 **Table S3. ATC-codes for identification of dementia medication.**

|                                                                   |
|-------------------------------------------------------------------|
| <b>N06DA</b> Anticholinesterases                                  |
| N06DA02 Donepezil                                                 |
| N06DA03 Rivastigmine                                              |
| N06DA04 Galantamine                                               |
| (N06DA01 Tacrine and N06DA05 Ipidacrine not prescribed in Sweden) |
| <b>N06DX</b> Other anti-dementia drugs                            |
| N06DX01 Memantine                                                 |
| (N06DX02 Ginkgo folium not prescribed in Sweden)                  |

119

**Table S4.** Descriptive statistics of the cognitive sample. Data presented for the dizygotic (DZ) and monozygotic (MZ) twins include those individuals who were available for the within-pair analysis. Values are mean (standard deviation, SD) unless otherwise indicated.

|                                              | Cognitive sample | Within-pair sample II          |                                |
|----------------------------------------------|------------------|--------------------------------|--------------------------------|
|                                              | N=10,487         | DZ twin individuals<br>N=4,376 | MZ twin individuals<br>N=1,547 |
| Age at baseline                              | 72.3 (5.9)       | 71.1 (5.1)                     | 71.4 (5.4)                     |
| Age range at baseline                        | 65-97            | 65-91                          | 65-88                          |
| Women, N (%)                                 | 5,872 (56.0)     | 2,417 (55.2)                   | 921 (59.5)                     |
| BMI                                          | 25.1 (3.5)       | 25.2 (3.5)                     | 25.0 (3.6)                     |
| Tobacco user, N (%)                          | 4,925 (47)       | 2,098 (47.9)                   | 664 (42.9)                     |
| Years of education                           | 8.9 (3.1)        | 9.1 (3.2)                      | 9.3 (3.2)                      |
| Cognitive function score                     | 16.2 (1.7)       | 16.4 (1.6)                     | 16.5 (1.5)                     |
| <sup>§</sup> Physical activity, median (IQR) |                  |                                |                                |
| Born before 1926                             | 1 (1)            | 1 (1)                          | 1 (1)                          |
| Born after 1926                              | 4 (1)            | 4 (1)                          | 4 (1)                          |
| Living alone, N (%)                          | 3,638 (34.7)     | 1,370 (31.3)                   | 501 (32.4)                     |
| FI, median (IQR)                             | 0.136 (0.125)    | 0.131 (0.119)                  | 0.131 (0.114)                  |
| Categorized FI                               |                  |                                |                                |
| Non-frail, N (%)                             | 2,635 (25.1)     | 1,189 (27.2)                   | 398 (25.7)                     |
| Pre-frail, N (%)                             | 6,407 (61.1)     | 2,653 (60.6)                   | 966 (62.4)                     |
| Frail, N (%)                                 | 1,445 (13.8)     | 532 (12.2)                     | 183 (11.8)                     |
| Dementia diagnosis during follow-up, N (%)   |                  |                                |                                |
|                                              | 2,355 (22.5)     | 909 (20.8)                     | 323 (20.9)                     |
| Time to diagnosis, median (IQR)              | 15.2 (8.3)       | 16.2 (7.2)                     | 16.7 (6.4)                     |
| Died during follow-up, N (%)                 | 6,513 (62.1)     | 1,646 (37.6)                   | 582 (54.4)                     |

Note. Participants who used tobacco products include current smokers, ex-smokers, and snuff users at baseline. Cognitive function score (ranging from 0 to 19 points) at baseline, a higher value means a better cognitive function. <sup>§</sup>Physical activity was assessed using a different questionnaire for those born before 1926 vs after 1926.

Abbreviations: BMI body mass index; DZ dizygotic; FI frailty index; IQR interquartile range; MZ monozygotic; N number



**Table S5.** Descriptive statistics of the study population stratified by dementia diagnosis. Values are mean (SD) unless otherwise indicated.

|                                  | Full sample (N=41,550) |               |               | Cognitive sample (N=10,487) |               |               |
|----------------------------------|------------------------|---------------|---------------|-----------------------------|---------------|---------------|
|                                  | All                    | No dementia   | Dementia      | All                         | No dementia   | Dementia      |
| N of participants                | 41,550                 | 38,367        | 3,183         | 10,487                      | 8,132         | 2,355         |
| Age at baseline                  | 58.0 (10.1)            | 57.1 (9.7)    | 69.5 (8.3)    | 72.3 (5.9)                  | 72.0 (5.9)    | 73.3 (5.6)    |
| Women, N (%)                     | 22,193 (53.4)          | 20,294 (52.9) | 1,899 (59.7)  | 5,872 (56.0)                | 4,420 (54.4)  | 1,452 (61.7)  |
| BMI                              | 25.0 (3.5)             | 25.0 (3.5)    | 25.0 (3.4)    | 25.1 (3.5)                  | 25.2 (3.6)    | 25.0 (3.4)    |
| Tobacco users, N (%)             | 24,491 (58.9)          | 22,967 (59.9) | 1,524 (47.9)  | 4,925 (47.0)                | 3,912 (48.1)  | 1,013 (43.0)  |
| Years of education               | 10.6 (3.2)             | 10.7 (3.2)    | 9.0 (3.0)     | 8.9 (3.1)                   | 9.0 (3.1)     | 8.6 (3.0)     |
| Cognitive function score         |                        |               |               | 16.2 (1.7)                  | 16.4 (1.5)    | 15.6 (2.1)    |
| §Physical activity, median (IQR) |                        |               |               |                             |               |               |
| Born before 1926                 | 1 (1)                  | 1 (1)         | 1 (1)         | 1 (1)                       | 1 (1)         | 1 (1)         |
| Born after 1926                  | 3 (2)                  | 3 (2)         | 4 (1)         | 4 (1)                       | 4 (1)         | 4 (1)         |
| Living alone, N (%)              | 9,005 (21.7)           | 7,973 (20.8)  | 1,032 (32.5)  | 3,638 (34.7)                | 2,790 (34.3)  | 848 (36.1)    |
| FI, median (IQR)                 | 0.108 (0.108)          | 0.108 (0.114) | 0.131 (0.119) | 0.136 (0.125)               | 0.136 (0.125) | 0.136 (0.125) |
| Time to follow-up, median (IQR)  | 16.0 (2.4)             | 16.0 (2.3)    | 15.8 (5.3)    | 15.2 (8.3)                  | 15.4 (9.1)    | 14.9 (6.0)    |
| Categorized FI                   |                        |               |               |                             |               |               |
| Non-frail, N (%)                 | 15,464 (37.2)          | 14,604 (38.1) | 860 (27.0)    | 2,635 (25.1)                | 2,035 (25.0)  | 600 (25.5)    |
| Pre-frail, N (%)                 | 22,354 (53.8)          | 20,439 (53.3) | 1,915 (60.2)  | 6,407 (61.1)                | 4,966 (61.1)  | 1,441 (61.2)  |
| Frail, N (%)                     | 3,732 (9.0)            | 3,324 (8.7)   | 408 (12.8)    | 1,445 (13.8)                | 1,131 (13.9)  | 314 (13.3)    |

Note. In the cognitive function score (ranging from 0 to 19 points), a higher value indicates better cognitive function. §Physical activity was assessed using a different questionnaire for those born before 1926 vs after 1926.

Abbreviations: BMI, body mass index; DZ, dizygotic; FI, frailty index; IQR, interquartile range; MZ, monozygotic; N, number; SD, standard deviation

138 **Table S6.** Descriptive statistics of the study population by sex. Values are mean (SD) unless otherwise indicated.

|                                              | Full sample (N=41,550) |               |               | Cognitive sample (N=10,487) |               |               |
|----------------------------------------------|------------------------|---------------|---------------|-----------------------------|---------------|---------------|
|                                              | All                    | Men           | Women         | All                         | Men           | Women         |
| N of participants (%)                        | 41,550                 | 19,357 (46.6) | 22,193 (53.4) | 10,487                      | 4,615         | 5,872         |
| Age at baseline                              | 58.0 (10.1)            | 57.6 (9.8)    | 58.4 (10.4)   | 72.3 (5.9)                  | 71.9 (5.6)    | 72.7 (6.0)    |
| BMI                                          | 25.0 (3.5)             | 25.6 (3.1)    | 24.5 (3.8)    | 25.1 (3.5)                  | 25.3 (3.0)    | 25.0 (3.9)    |
| Tobacco users, N (%)                         | 24,491 (58.9)          | 12,345 (63.8) | 12,146 (54.7) | 4,925 (50)                  | 2,854 (61.8)  | 2,071 (35.3)  |
| Years of education                           | 10.6 (3.2)             | 10.6 (3.2)    | 10.6 (3.2)    | 8.9 (3.1)                   | 9.2 (3.3)     | 8.6 (2.9)     |
| Cognitive function score                     |                        |               |               | 16.2 (1.7)                  | 16.4 (1.7)    | 16.1 (1.7)    |
| <sup>§</sup> Physical activity, median (IQR) |                        |               |               |                             |               |               |
| Born before 1926                             | 1 (1)                  | 1 (1)         | 1 (0)         | 1 (1)                       | 1 (1)         | 1 (0)         |
| Born after 1926                              | 3 (2)                  | 3 (2)         | 4 (1)         | 4 (1)                       | 4 (1)         | 4 (1)         |
| Living alone, N (%)                          | 9,005 (21.7)           | 3,410 (17.6)  | 5,595 (25.2)  | 3,638 (34.7)                | 965 (20.9)    | 2,673 (45.6)  |
| FI, median (IQR)                             | 0.108 (0.108)          | 0.097 (0.097) | 0.119 (0.119) | 0.136 (0.125)               | 0.119 (0.108) | 0.148 (0.131) |
| Time to follow-up, median (IQR)              | 16.0 (2.4)             | 15.9 (2.41)   | 16.1 (2.40)   | 15.2 (8.3)                  | 14.0 (9.3)    | 16.0 (7.3)    |
| Categorized FI                               |                        |               |               |                             |               |               |
| Non-frail, N (%)                             | 15,464 (37.2)          | 8,142 (42.1)  | 7,322 (33.0)  | 2,610 (25.1)                | 1,297 (28.3)  | 1,313 (22.6)  |
| Pre-frail, N (%)                             | 22,354 (53.8)          | 10,117 (52.3) | 12,237 (55.1) | 6,351 (61.1)                | 2,844 (62.1)  | 3,507 (60.3)  |
| Frail, N (%)                                 | 3,732 (9.0)            | 1,098 (5.7)   | 2,634 (11.9)  | 1,429 (13.8)                | 437 (9.6)     | 992 (17.1)    |
| Dementia diagnosis during follow-up, N (%)   | 3,183 (7.7)            | 1,284 (6.6)   | 1,899 (8.6)   | 2,340 (22.5)                | 896 (19.6)    | 1,444 (24.9)  |

139 Note. In the cognitive function score (ranging from 0 to 19 points), a higher value indicates better cognitive function.<sup>§</sup>Physical  
140 activity was assessed using a different questionnaire for those born before 1926 vs after 1926.

141 Abbreviations: BMI, body mass index; DZ, dizygotic; FI, frailty index; IQR, interquartile range; MZ, monozygotic; N, number;  
142 SD, standard deviation

**Table S7.** Association of the frailty index (FI) with the risk of dementia assessed by Cox regression in the cognitive sample (left panel) and in the genotyped samples II adjusted for *APOE*  $\epsilon 4$  carrier status (right panel). Hazard ratios (HRs) and 95% confidence intervals (CIs) are presented for a 10% increase in the FI.

|                                                                     | <b>Multivariate Cox model</b> |                    | <b>Multivariate Cox models<br/>adjusted for <i>APOE</i> <math>\epsilon 4</math> carrier status</b> |                    |
|---------------------------------------------------------------------|-------------------------------|--------------------|----------------------------------------------------------------------------------------------------|--------------------|
|                                                                     | Cognitive sample (N=10,487)   |                    | Genotyped sample II (N=3,156)                                                                      |                    |
|                                                                     | Model 1                       | Model 2            | Model 1                                                                                            | Model 2            |
|                                                                     | HR (95% CI)                   | HR (95% CI)        | HR (95% CI)                                                                                        | HR (95% CI)        |
| FI                                                                  | 1.15 (1.09, 1.20)*            | 1.13 (1.07, 1.18)* | 1.16 (1.05, 1.27)*                                                                                 | 1.15 (1.04, 1.27)* |
| Age at FI measurement                                               | 1.14 (1.13, 1.15)*            | 1.13 (1.12, 1.14)* | 1.13 (1.11, 1.15)*                                                                                 | 1.14 (1.12, 1.16)* |
| Sex                                                                 | 0.86 (0.78, 0.94)*            | 0.84 (0.76, 0.92)* | 0.81 (0.68, 0.97)*                                                                                 | 0.80 (0.67, 0.96)* |
| Education years                                                     | 0.97 (0.95, 0.98)*            | 0.99 (0.98, 1.01)  | 1.00 (0.98, 1.03)                                                                                  | 1.00 (0.98, 1.03)  |
| Tobacco use                                                         | 1.17 (1.06, 1.28)*            | 1.20 (1.09, 1.31)* | 1.14 (0.96, 1.35)                                                                                  | 1.14 (0.96, 1.35)  |
| Cognitive function score                                            |                               | 0.79 (0.77, 0.81)* | 0.88 (0.83, 0.92)*                                                                                 | 0.88 (0.84, 0.93)* |
| <i>APOE</i> $\epsilon 4$ status (ref. non-carrier)                  |                               |                    |                                                                                                    |                    |
| Heterozygous ( $\epsilon 2/\epsilon 4$ or $\epsilon 3/\epsilon 4$ ) |                               |                    |                                                                                                    | 1.79 (1.50, 2.13)* |
| Homozygous ( $\epsilon 4/\epsilon 4$ )                              |                               |                    |                                                                                                    | 5.04 (3.44, 7.38)* |

Note. Model 1 in the right panel presents associations in the genotyped sample II without adjusting for *APOE*  $\epsilon 4$  status, whereas Model 2 additionally adjusts for *APOE*  $\epsilon 4$  status. \*P<0.05

**Table S8.** Association of the frailty index (FI) with the risk of dementia assessed by the competing risk model in the full (left panel) and cognitive (right panel) samples. Subdistribution hazard ratios (SHRs) and 95% confidence intervals (CIs) from the competing risk model are presented for a 10% increase in FI.

|                           | Full sample (N=41,550) |                    | Cognitive sample (N=10,487) |                    |
|---------------------------|------------------------|--------------------|-----------------------------|--------------------|
|                           | Model 1                | Model 2            | Model 1                     | Model 2            |
|                           | SHR (95% CI)           | SHR (95% CI)       | SHR (95% CI)                | SHR (95% CI)       |
| FI                        | 1.54 (1.34, 1.76)*     | 1.52 (1.33, 1.75)* | 1.43 (1.23, 1.67)*          | 1.41 (1.21, 1.64)* |
| Male sex                  | 1.10 (1.03, 1.19)*     | 1.10 (1.02, 1.18)* | 1.24 (1.14, 1.35)*          | 1.20 (1.10, 1.31)* |
| Age at FI measurement     | 1.10 (1.09, 1.10)*     | 1.10 (1.09, 1.10)* | 1.03 (1.03, 1.04)*          | 1.02 (1.01, 1.03)* |
| Years of education        |                        | 0.97 (0.96, 0.98)* | 0.98 (0.97, 0.99)*          | 1.00 (0.99, 1.02)  |
| Tobacco user              |                        | 1.02 (0.94, 1.10)  | 0.94 (0.87, 1.03)           | 0.97 (0.89, 1.06)  |
| Cognitive function score  |                        |                    |                             | 0.78 (0.76, 0.80)* |
| Time varying effect of FI | 0.97 (0.96, 0.98)*     | 0.97 (0.96, 0.98)* | 0.97 (0.96, 0.98)*          | 0.97 (0.96, 0.98)* |

Note. Time varying effect of FI represents the interaction term between FI and time since measurement; this term was introduced as it was statistically significant in the competing risk models in both full and cognitive samples. \*P<0.05

178 **Table S9.** Association of the frailty categories with the risk of dementia assessed by Cox regression in the full (left panel) and  
 179 cognitive (right panel) samples, adjusted for age, sex, education, tobacco use and cognitive function.

|                          | Full sample<br>(N=41,550) | Cognitive sample<br>(N=10,487) |
|--------------------------|---------------------------|--------------------------------|
|                          | HR (95% CI)               | HR (95% CI)                    |
| Frailty (ref. non-frail) |                           |                                |
| Pre-frail                | 1.19 (1.09, 1.29)*        | 1.14 (1.03, 1.26)*             |
| Frail                    | 1.54 (1.35, 1.75)*        | 1.39 (1.20, 1.62)*             |
| Age                      | 1.15 (1.14, 1.16)*        | 1.13 (1.12, 1.14)*             |
| Male sex                 | 0.88 (0.81, 0.95)*        | 0.85 (0.77, 0.93)*             |
| Years of education       | 0.97 (0.96, 0.98)*        | 0.99 (0.98, 1.01)              |
| Tobacco user             | 1.19 (1.10, 1.29)*        | 1.20 (1.09, 1.32)*             |
| Cognitive function score |                           | 0.79 (0.77, 0.81)*             |

180 Note. Categorization of the frailty index was based on the frailty index as follows: non-frail (FI  $\leq$  0.08), pre-frail (FI > 0.08-0.25) and  
 181 frail (FI > 0.25). \*P < 0.05

182

183

184

185

186

187

188

189 **Table S10.** Association of the frailty index (FI) with the risk of dementia in complete DZ and MZ twin pairs in the multivariate Cox  
190 model (left panel) and in the within-pair model (right panel). Hazard ratios (HRs) and 95% confidence intervals (CIs) are presented for  
191 a 10% increase in FI.

192

|                          | <b>Within-pair sample II</b>  |                    |                          |                    |
|--------------------------|-------------------------------|--------------------|--------------------------|--------------------|
|                          | DZ twins                      | MZ twins           | DZ twins                 | MZ twins           |
|                          | N=2,176 pairs                 | N=766 pairs        | N=2,176 pairs            | N=766 pairs        |
|                          | <b>Multivariate Cox model</b> |                    | <b>Within-pair model</b> |                    |
|                          | HR (95% CI)                   | HR (95% CI)        | HR (95% CI)              | HR (95% CI)        |
| FI                       | 1.19 (1.10, 1.29)*            | 1.05 (0.91, 1.19)  | 1.21 (1.07, 1.37)*       | 1.24 (0.94, 1.63)  |
| Age at FI measurement    | 1.13 (1.11, 1.15)*            | 1.12 (1.09, 1.15)* | 1.15 (1.13, 1.17)*       | 1.15 (1.11, 1.18)* |
| Sex                      | 0.80 (0.69, 0.93)*            | 0.89 (0.68, 1.17)  | 0.70 (0.56, 0.87)*       | 0.92 (0.66, 1.28)  |
| Education years          | 0.99 (0.97, 1.02)             | 0.97 (0.93, 1.01)  | 0.99 (0.95, 1.04)        | 0.94 (0.86, 1.04)  |
| Tobacco use              | 1.16 (1.00, 1.35)             | 1.14 (0.88, 1.49)  | 1.27 (1.01, 1.62)*       | 0.75 (0.46, 1.23)  |
| Cognitive function score | 0.82 (0.78, 0.86)*            | 0.82 (0.76, 0.88)* | 0.83 (0.78, 0.89)*       | 0.97 (0.86, 1.09)  |

193 Note. The left panel presents associations between the FI and dementia using multivariate Cox model, whereas the right panel presents  
194 the within-pair associations from the within-pair model. \*P<0.05

195  
196  
197  
198  
199  
200  
201  
202  
203  
204  
205  
206  
207

208 **Table S11.** Sex-stratified associations between the frailty index (FI) and the risk of dementia in dizygotic (DZ) and monozygotic (MZ)  
209 twins assessed by Cox regression. The hazard ratios (HRs) and 95% confidence intervals (CIs) are presented for a 10% increase in the  
210 FI. All models were adjusted for age, education years, tobacco user and cognitive level score.

|                              | <b>Women</b>         |                      | <b>Men</b>           |                      |
|------------------------------|----------------------|----------------------|----------------------|----------------------|
|                              | <b>DZ twin pairs</b> | <b>MZ twin pairs</b> | <b>DZ twin pairs</b> | <b>MZ twin pairs</b> |
|                              | HR (95% CI)          | HR (95% CI)          | HR (95% CI)          | HR (95% CI)          |
| <b>Within-pair sample I</b>  |                      |                      |                      |                      |
| Multivariate Cox model       | 1.23 (1.14, 1.33)*   | 1.15 (1.01, 1.31)*   | 1.22 (1.10, 1.35)*   | 1.07 (0.87, 1.31)    |
| Within-pair model            | 1.20 (1.04, 1.38)*   | 1.24 (0.95, 1.63)    | 1.29 (1.08, 1.55)*   | 0.89 (0.61, 1.30)    |
| <b>Within-pair sample II</b> |                      |                      |                      |                      |
| Multivariate Cox model       | 1.20 (1.09, 1.32)*   | 1.08 (0.92, 1.28)    | 1.17 (1.02, 1.34)*   | 0.96 (0.75, 1.21)    |
| Within-pair model            | 1.14 (0.97, 1.35)    | 1.33 (0.95, 1.85)    | 1.28 (1.01, 1.63)*   | 0.96 (0.58, 1.59)    |

211 \*P<0.05

212

213

214

215

216

217

218 **Table S12.** The associations between dementia and the frailty index (FI) constructed from traditional risk factors for dementia (FI-  
 219 TRF, Model 1) and non-traditional risk factors for dementia (FI-NTRF, Model 2) assessed by Cox regression in the cognitive sample  
 220 adjusted for age, sex, education, tobacco use and cognitive function level.

|                          | <b>Cognitive sample</b> |                    |
|--------------------------|-------------------------|--------------------|
|                          | Model 1                 | Model 2            |
|                          | HR (95% CI)             | HR (95% CI)        |
| FI-TRF                   | 1.11 (1.07, 1.15)*      |                    |
| FI-NTRF                  |                         | 1.09 (1.04, 1.14)* |
| Male sex                 | 0.85 (0.78, 0.94)*      | 0.84 (0.76, 0.93)* |
| Age at FI measurement    | 1.13 (1.12, 1.14)*      | 1.13 (1.12, 1.14)* |
| Years of education       | 0.99 (0.98, 1.01)       | 0.99 (0.98, 1.01)  |
| Tobacco user             | 1.21 (1.10, 1.32)*      | 1.20 (1.09, 1.32)* |
| Cognitive function score | 0.79 (0.77, 0.81)*      | 0.79 (0.77, 0.81)* |

221 \*P<0.05.  
 222  
 223  
 224  
 225  
 226



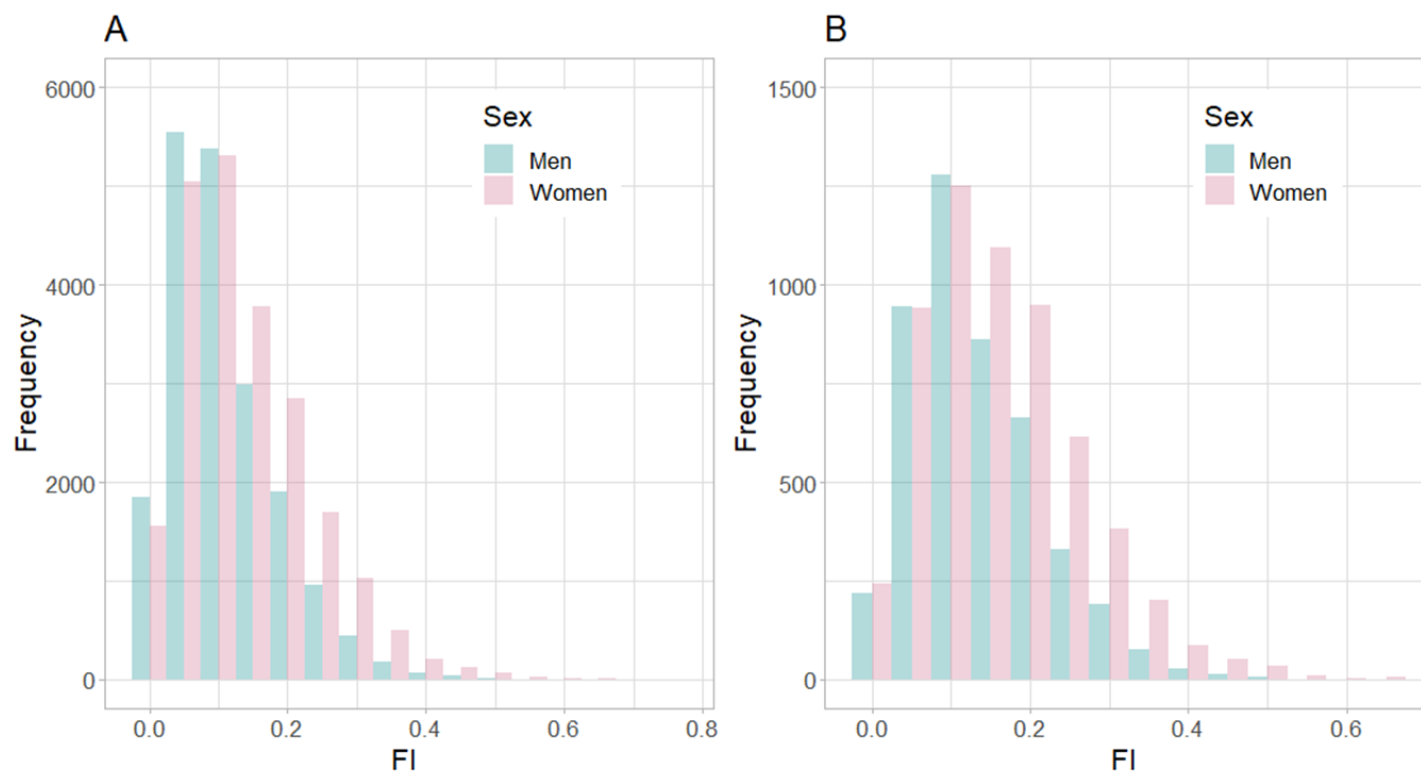

**Figure S1.** The distribution of the frailty index (FI) in the full (A) and cognitive samples (B) by sex.

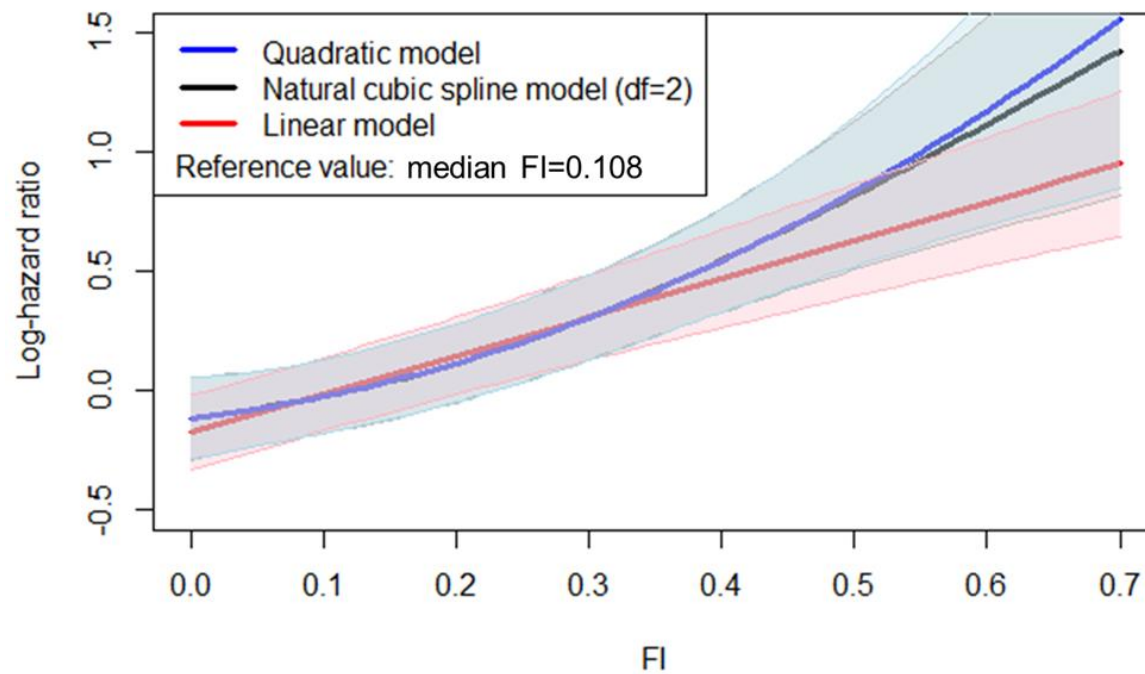

**Figure S2.** Assessing the functional form of the association between the frailty index (FI) and the risk of dementia in the full sample. The log-hazard ratios for the quadratic, cubic spline -transformed and linear FI are presented in reference to the cohort median FI=0.108. Abbreviations: df, degrees of freedom.

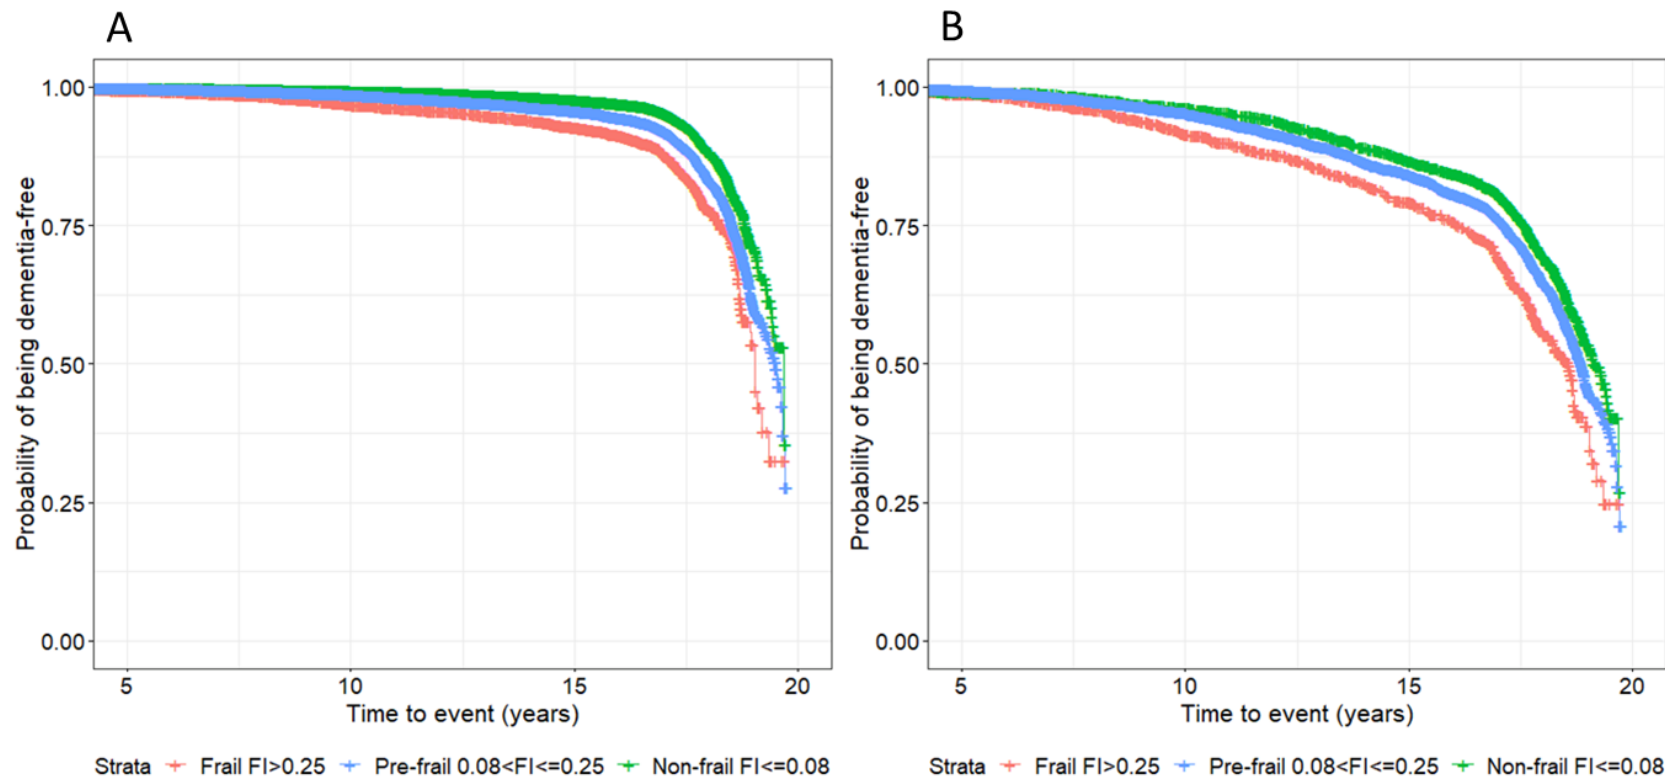

**Figure S3.** Kaplan-Meier plots for being dementia-free during the follow-up for non-frail, pre-frail, and frail individuals in the full (A) and cognitive sample (B).

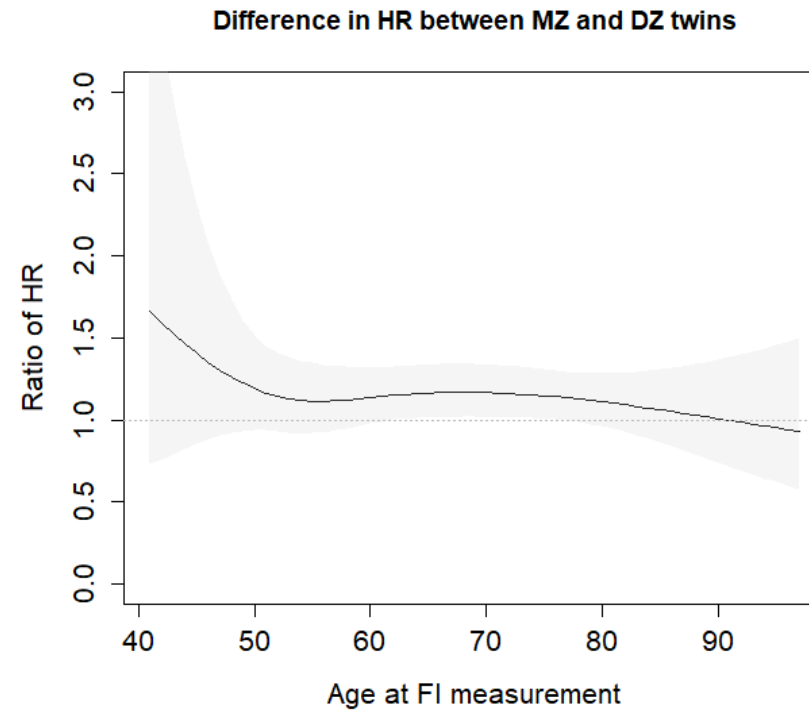

241

242 **Figure S4.** The ratio of the hazard ratios (HRs;  $HR_{DZ}/HR_{MZ}$ ) in the within-pair interaction model in the within-pair sample I adjusted

243 for age at frailty index measurement, sex, education years and tobacco use.

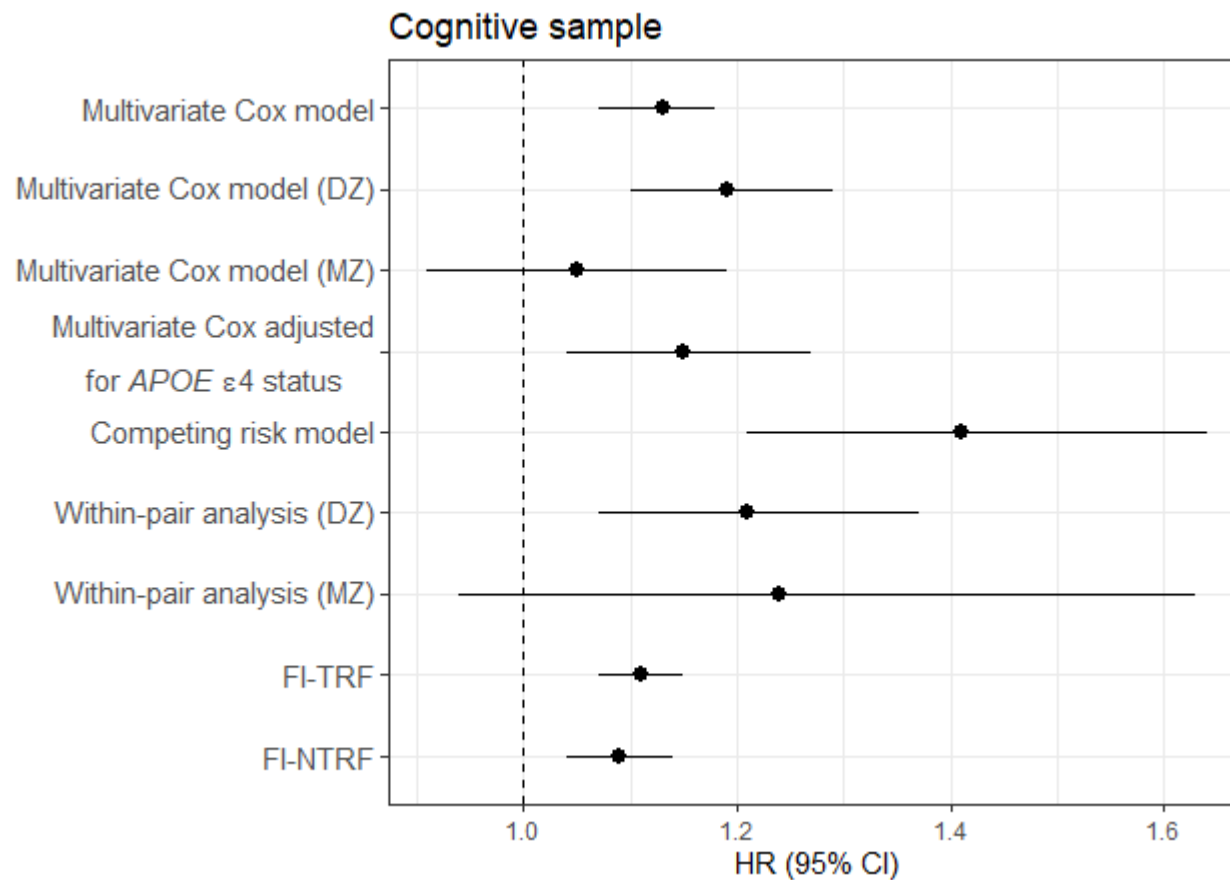

**Figure S5.** Hazard ratios (HRs) and the subdistribution HR (SHR) for the competing risk model and 95% confidence intervals (CIs) of incident dementia in relation to a 10% increase in the frailty index (FI) in the cognitive sample. Abbreviations: FI-NTRF, frailty index constructed from non-traditional dementia risk factors; FI-TRF; frailty index constructed from traditional dementia risk factors; DZ, dizygotic; MZ, monozygotic.

## References

1. Gatz M, Fratiglioni L, Johansson B, Berg S, Mortimer JA, Reynolds CA, et al. Complete ascertainment of dementia in the Swedish Twin Registry: the HARMONY study. *Neurobiol Aging*. 2005;26(4):439-47.
2. Blessed G, Tomlinson BE, Roth M. The association between quantitative measures of dementia and of senile change in the cerebral grey matter of elderly subjects. *Br J Psychiatry*. 1968;114(512):797-811.
3. Sjölander A, Lichtenstein P, Larsson H, Pawitan Y. Between-within models for survival analysis. *Statistics in medicine*. 2013;32(18):3067-76.
